# Supplementary material
Source: publisher site journal article supplement (https://www.dovepress.com/article/348260)
Supplement: Supplementary file 1 [file get_supplementary_file.php]

**Additional file**

**Informed consent and data collection instruments**

The informed consent form and the study data collection instruments used for assessing on perceptions and involvements of community pharmacy professionals in the prevention and management of cardiovascular diseases (CVDs) in Gondar city and nearby rural towns are given below.

**Informed Consent form**

Dear participant,

We would like to kindly request your consent to participate on the study. The aim of this study is to assess perceptions and involvements of community pharmacy professionals in the prevention and management of cardiovascular diseases (CVDs) in Gondar city and nearby rural towns. This is a cross-sectional study; the questioner comprises of questions regarding your socio-demographics information, perceptions and involvements in the prevention and management of cardiovascular disease (CVDs). This questionnaire will hardly take your 10 minutes and all the information we obtain will remain strictly confidential and your answer and name will never be revealed. We assure you that it is totally a voluntary participation and feel free to refuse or to withdraw at any point in the study.

Do you agree to participate in this study? 1. Yes ---- 2. No ----

**Data collection instruments**

Part I: Socio-demographic characteristics

| Sex | 1. Male 2. Female |
| --- | --- |
| Age (in years) | ----------- |
| Settings participants involved | 1.Gondar city 2. Rural towns |
| Work experience | 1. < 1year 2. 1-5 Years 3. >5 years |
| Highest educational qualification | 1. Pharmacy technician 2. Druggist 3. Degree and above |
| Monthly income (birr) | 1. ≤1499 2. 1500-2999 3. >3000- 4999 5. ≥ 5000 |
| Type of community medication retail outlets (CMROs) respondents involved from | 1.Drug store 2. Pharmacy |
| Average number of clients served per day | 1. <50 2. 50-100 3. >100 |
| Duration of service provides per day in hour | 1. <_8 2. >8 |
| Previous training on CVDs prevention and management? | 1. Yes 2. No |
| Do you know better about prevention and management of CVDs? | 1. Yes 2. No |

Part II: Perceptions of community pharmacy professionals about the prevention and treatment of cardiovascular disease **(Strongly disagree=1, Disagree=2, Neutral=3. Agree=4, strongly agree=5**)

| Statements | Strongly disagree | Disagree | Neutral | Agree | Strongly agree |
| --- | --- | --- | --- | --- | --- |
| 1. Cardiovascular disease is common and has a raising prevalence in Ethiopia |  |  |  |  |  |
| 1. Cardiovascular disease relates largely to obesity and sedentary lifestyles |  |  |  |  |  |
| 1. More attention must be given to modifications of lifestyles of the general population |  |  |  |  |  |
| 1. Individual patients with cardiovascular disease need to be identified early so that their multiple risk factors can be reduced |  |  |  |  |  |
| 1. Following weight loss program decrease cardiovascular risks |  |  |  |  |  |
| 1. Increase exercise decrease cardiovascular risks |  |  |  |  |  |
| 1. Use of prescribed medications for the treatment of the individual components of cardiovascular disease is important |  |  |  |  |  |
| 1. Use dietary supplements and herbals is used to decrease CV risks |  |  |  |  |  |
| 1. Alcohol consumptions restrictions is used to prevent cardiovascular risks |  |  |  |  |  |
| 1. Early screening of patients is important to prevent sever outcomes |  |  |  |  |  |
| 1. Documenting drug refill history is important CVD evaluation |  |  |  |  |  |

Part III: Involvement of community pharmacy professionals towards the prevention and treatment of cardiovascular disease (**Not at all involved=1, little involved=2, uncertain=3, involved=4, very involved=5**)

| Items | Not at all involved | Little involved | Uncertain | Involved | Very involved |
| --- | --- | --- | --- | --- | --- |
| 1. Advice to weight reduction through low calorie diet |  |  |  |  |  |
| 1. Physical activity promotion |  |  |  |  |  |
| 1. Advice on salt restriction |  |  |  |  |  |
| 1. Counsel on cholesterol-lowering diet (composed of reduced cholesterol/saturated fat intake) |  |  |  |  |  |
| 1. Counsel on consumption of vegetables |  |  |  |  |  |
| 1. Counsel on increase consumption of soluble fiber |  |  |  |  |  |
| 1. Counsel about the cautions of over-the-counter drugs or herbal products as they relate cardiovascular disease |  |  |  |  |  |
| 1. Advice on Alcohol consumption |  |  |  |  |  |
| 1. Advice on smoking cessation |  |  |  |  |  |
| 1. Review the patients drug refill history to evaluate adherence to drug therapy |  |  |  |  |  |
| 1. Advise patients on the importance of routine weight, blood pressure and blood glucose monitoring and the importance of achieving the target goals |  |  |  |  |  |
| 1. Involving in screening and measurement of BP, weight, glucose level |  |  |  |  |  |
| 1. Selling equipment for home blood pressure and blood glucose monitoring |  |  |  |  |  |
| 1. Advise patients about on prescription treatment and self-care for the components of cardiovascular disease |  |  |  |  |  |
| 1. Encourage patient’s adherence with treatment |  |  |  |  |  |
| 1. Monitor patients’ response to the treatment |  |  |  |  |  |
| 1. Keeping records of patients care services in the pharmacy |  |  |  |  |  |
| 1. Refer patients to physicians if required |  |  |  |  |  |

Part IV: Possible barriers of community pharmacy professionals to involve in counseling, prevention and treatment of cardiovascular disease

| Barriers to involvement (**you can choose more than one possible barrier**) |
| --- |
| 1. Lack of time or increase workload |
| 1. Inability or difficulty in identifying targeted patients |
| 1. Lack of pharmacists’ knowledge or skills in providing counseling |
| 1. Lack of private counseling area |
| 1. Lack of manager or provider support |
| Others ------ |

**Thank you for participation!**
